# Supplementary material for: Influence of ligand substitution at the donor and acceptor center on MMCT in a cyanide-bridged mixed-valence system
Source: Royal Society of Chemistry journal article supplement (doi:10.1039/c9dt01303b), 2019-01-01
Supplement: c9dt01303b1.pdf [file c9dt01303b1.pdf]

## **Influence of Substitution of Ligand at Donor and Acceptor Center on MMCT in Cyanide-Bridged Mixed-Valence System**

Lin-Tao Zhang,<sup>a,b</sup> Xiao-Quan Zhu,<sup>a</sup> Sheng-Min Hu,<sup>a</sup> Yu-Xiao Zhang,<sup>a,b</sup> Shao-Dong Su,<sup>a,b</sup> Yu-Ying Yang,<sup>a,b</sup> Xin-Tao Wu<sup>a</sup> and Tian-Lu Sheng<sup>\*a</sup>

**[a]** State Key Laboratory of Structural Chemistry Fujian Institute of Research on the Structure of Matter, Chinese Academy of Sciences. Fuzhou, 350002, China.

**[b]** School of Chemistry and Chemical Engineering, University of Chinese Academy of Sciences. Beijing, 100049, China.

### **Content**

1. Molecular structures of all complexes
2. Crystallographic data from single-crystal X-ray analysis
3. IR spectroscopy
4. Electrochemistry
5. UV-Vis- NIR spectroscopy
6. Theory calculations

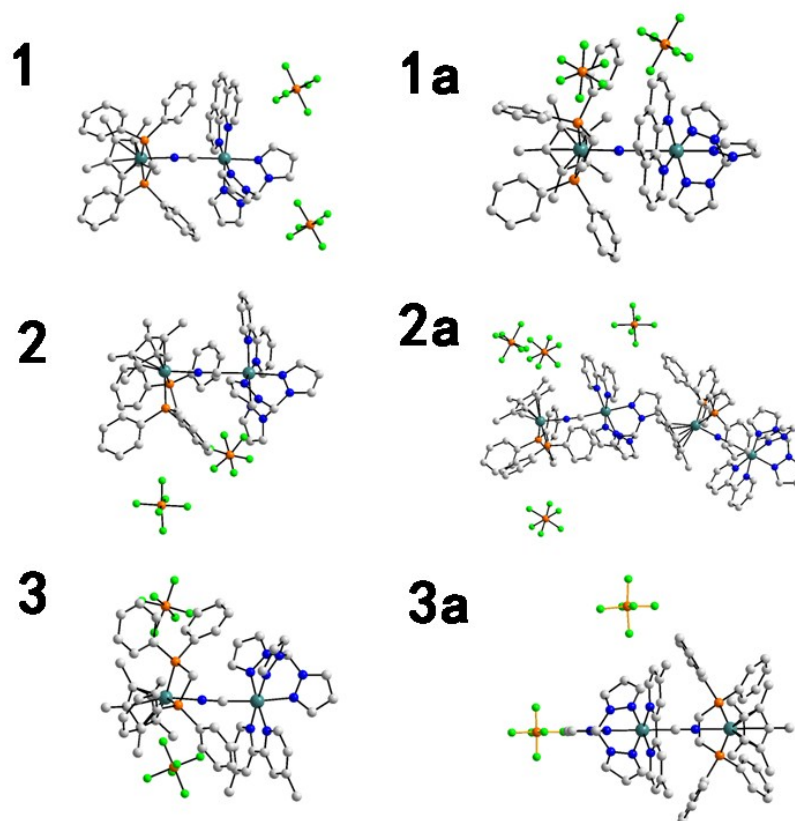

**Figure S1** Molecular structures of complexes **1-3** and **1a-3a** (hydrogen atoms and solvent molecules have been removed for clarity). Ru, dark green; N, blue; P, orange; C, gray; F, light green.

**Table S1.** Crystallographic data of complexes **1-3** and **1a-3a**.

|                                | <b>1</b>                       | <b>2</b>                                  | <b>3</b>                       |
|--------------------------------|--------------------------------|-------------------------------------------|--------------------------------|
| Empirical formula              | $C_{58}H_{55}F_{12}N_9P_4Ru_2$ | $C_{57}H_{57}Cl_2F_{12}N_9OP_4$<br>$Ru_2$ | $C_{58}H_{59}F_{12}N_9P_4Ru_2$ |
| Formula weight                 | 1432.13                        | 1509.03                                   | 1436.16                        |
| Temperature (K)                | 293(2)                         | 293(2)                                    | 293(2)                         |
| Wavelength (Å)                 | 0.71073                        | 0.71073                                   | 0.71073                        |
| Crystal system,<br>space group | Monoclinic,<br>$P2_1/n$        | Monoclinic,<br>$P2_1/c$                   | Monoclinic,<br>$P2_1/n$        |
| A (Å)                          | 12.637(8)                      | 13.517(2)                                 | 13.820(3)                      |
| B (Å)                          | 26.812(15)                     | 19.619(4)                                 | 19.400(4)                      |

|                                               |                                    |                                    |                                     |
|-----------------------------------------------|------------------------------------|------------------------------------|-------------------------------------|
| c (Å)                                         | 19.841(13)                         | 27.456(4)                          | 25.820(5)                           |
| Alpha (deg.)                                  | 90                                 | 90                                 | 90                                  |
| Beta (deg.)                                   | 100.182(9)                         | 112.215(6)                         | 101.65(3)                           |
| Gamma (deg.)                                  | 90                                 | 90                                 | 90                                  |
| Volume (Å <sup>3</sup> )                      | 6616(7)                            | 6741(2)                            | 6780(3)                             |
| Z                                             | 4                                  | 4                                  | 4                                   |
| Calculated density<br>(Mg/m <sup>3</sup> )    | 1.438                              | 1.487                              | 1.407                               |
| Absorption coefficient<br>(mm <sup>-1</sup> ) | 0.630                              | 0.700                              | 0.615                               |
| F(000)                                        | 2888                               | 3040                               | 2904                                |
| Theta range for data<br>collection (deg.)     | 2.506 to 27.560                    | 2.079 to 27.514                    | 2.122 to 33.490                     |
| Reflections collected /<br>unique             | 75792 / 14978<br>[R(int) = 0.0696] | 91883 / 15393<br>[R(int) = 0.0645] | 122165 / 24918<br>[R(int) = 0.0311] |
| Data / restraints /<br>parameters             | 14978 / 12 / 771                   | 15393 / 49 / 798                   | 24918 / 1 / 773                     |
| Goodness-of-fit on<br>F <sup>2</sup>          | 1.094                              | 1.110                              | 1.090                               |
| Final R indices<br>[I > 2sigma(I)]            | R1 = 0.0866, wR2 =<br>0.2449       | R1 = 0.0664, wR2 =<br>0.1912       | R1 = 0.0562, wR2 =<br>0.1475        |
| R indices (all data)                          | R1 = 0.1021, wR2 =<br>0.2699       | R1 = 0.0769, wR2 =<br>0.2049       | R1 = 0.0605, wR2 =<br>0.1518        |

|                   | <b>1a</b>                                                                                     | <b>2a</b>                                                                                                            | <b>3a</b>                                                                                     |
|-------------------|-----------------------------------------------------------------------------------------------|----------------------------------------------------------------------------------------------------------------------|-----------------------------------------------------------------------------------------------|
| Empirical formula | C <sub>59</sub> H <sub>57</sub> F <sub>12</sub> N <sub>9</sub> P <sub>4</sub> Ru <sub>2</sub> | C <sub>231</sub> H <sub>234</sub> C <sub>16</sub> F <sub>48</sub> N <sub>36</sub> P <sub>16</sub><br>Ru <sub>8</sub> | C <sub>59</sub> H <sub>61</sub> F <sub>12</sub> N <sub>9</sub> P <sub>4</sub> Ru <sub>2</sub> |
| Formula weight    | 1446.15                                                                                       | 5943.31                                                                                                              | 1450.19                                                                                       |
| Temperature (K)   | 293(2)                                                                                        | 293(2)                                                                                                               | 293(2)                                                                                        |
| Wavelength (Å)    | 0.71073                                                                                       | 0.71073                                                                                                              | 0.71073                                                                                       |
| Crystal system,   | Monoclinic,                                                                                   | Orthorhombic,                                                                                                        | Orthorhombic,                                                                                 |
| Space group       | <i>P</i> 2 <sub>1</sub> / <i>n</i>                                                            | <i>Pna</i> 2 <sub>1</sub>                                                                                            | <i>Cmc</i> 2 <sub>1</sub>                                                                     |
| a (Å)             | 14.377(7)                                                                                     | 24.139(7)                                                                                                            | 14.330(4)                                                                                     |
| b (Å)             | 15.398(7)                                                                                     | 28.614(8)                                                                                                            | 24.429(6)                                                                                     |
| c (Å)             | 28.270(14)                                                                                    | 19.264(5)                                                                                                            | 19.346(8)                                                                                     |

|                                               |                                    |                                     |                                   |
|-----------------------------------------------|------------------------------------|-------------------------------------|-----------------------------------|
| Alpha (deg.)                                  | 90                                 | 90                                  | 90                                |
| Beta (deg.)                                   | 94.152(6)                          | 90                                  | 90                                |
| Gamma (deg.)                                  | 90                                 | 90                                  | 90                                |
| Volume (Å <sup>3</sup> )                      | 6242(5)                            | 13306(6)                            | 6772(4)                           |
| Z                                             | 4                                  | 2,                                  | 4                                 |
| Calculated density<br>(Mg/m <sup>3</sup> )    | 1.539                              | 1.483                               | 1.422                             |
| Absorption coefficient<br>(mm <sup>-1</sup> ) | 0.668                              | 0.687                               | 0.616                             |
| F(000)                                        | 2920                               | 5996                                | 2936                              |
| Theta range for data<br>collection (deg.)     | 2.539 to 27.475                    | 2.114 to 27.420                     | 2.674 to 27.413                   |
| Reflections collected /<br>unique             | 45554 / 14215<br>[R(int) = 0.1230] | 103343 / 29820<br>[R(int) = 0.0742] | 34227 / 7987<br>[R(int) = 0.0771] |
| Data / restraints /<br>parameters             | 14215 / 0 / 780                    | 29820 / 47 / 1594                   | 7987 / 293 / 423                  |
| Goodness-of-fit on<br>F <sup>2</sup>          | 1.110                              | 1.138                               | 0.972                             |
| Final R indices<br>[I > 2σ(I)]                | R1 = 0.0806, wR2 =<br>0.1687       | R1 = 0.0772, wR2 =<br>0.1839        | R1 = 0.0811, wR2 =<br>0.2138      |
| R indices (all data)                          | R1 = 0.1093, wR2 =<br>0.1854       | R1 = 0.0912, wR2 =<br>0.1945        | R1 = 0.0951, wR2 =<br>0.2346      |

$$R_1 = \frac{\sum(|F_0| - |F_c|)}{\sum|F_0|}$$

$$wR_2 = [\sum w(|F_0|^2 - |F_c|^2)^2 / \sum w|F_0|^2]^{1/2}$$

**Table S2.** Selected instances (Å) of complexes **1-3** and **1a-3a**.

|           | <b>Ru-P1</b>     | <b>Ru-P2</b>     |           | <b>Ru-P1</b>     | <b>Ru-P2</b>     |           | <b>Ru-P1</b>     | <b>Ru-P2</b>     |
|-----------|------------------|------------------|-----------|------------------|------------------|-----------|------------------|------------------|
| <b>1</b>  | 2.3062(19)       | 2.3104(15)       | <b>2</b>  | 2.3024(12)       | 2.3205(13)       | <b>3</b>  | 2.2920(9)        | 2.3130(8)        |
| <b>1a</b> | 2.3106(18)       | 2.2909(18)       | <b>2a</b> | 2.2953(11)       | 2.2954(10)       | <b>3a</b> | 2.2894(13)       | 2.2894(13)       |
|           | <b>Ru-C(C≡N)</b> | <b>Ru-N(C≡N)</b> |           | <b>Ru-C(C≡N)</b> | <b>Ru-N(C≡N)</b> |           | <b>Ru-C(C≡N)</b> | <b>Ru-N(C≡N)</b> |
| <b>1</b>  | 2.003(5)         | 2.067(4)         | <b>2</b>  | 1.991(4)         | 2.064(3)         | <b>3</b>  | 1.984(2)         | 2.063(2)         |
| <b>1a</b> | 2.008(6)         | 2.057(5)         | <b>2a</b> | 2.009(4)         | 2.078(3)         | <b>3a</b> | 2.012(6)         | 2.083(5)         |

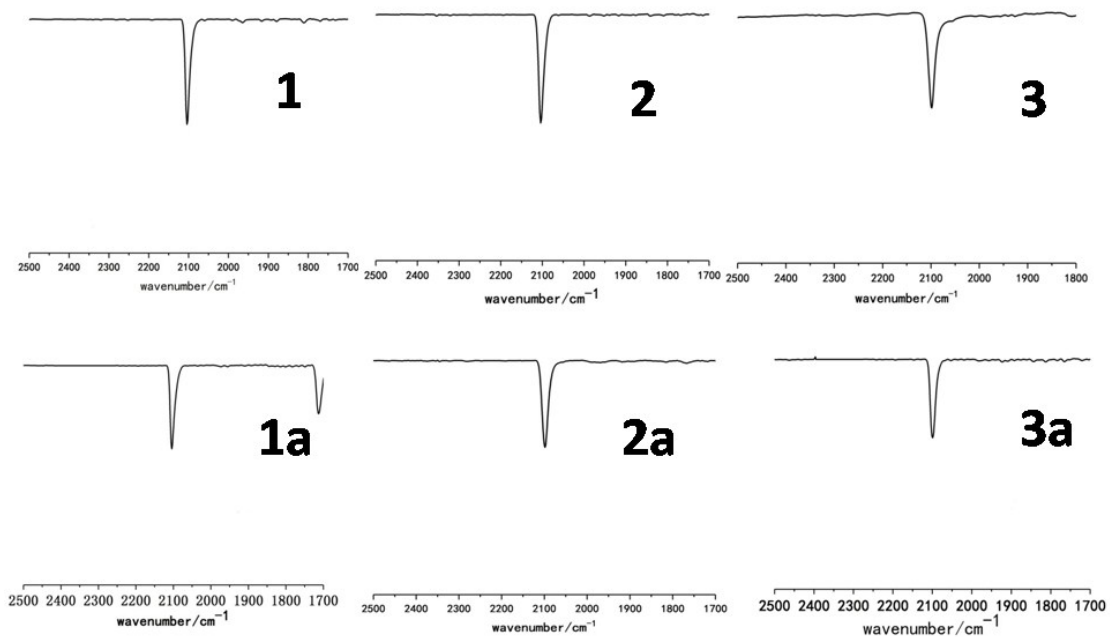

**Figure S2.** Stretching frequencies of complexes **1-3** and **1a-3a**.

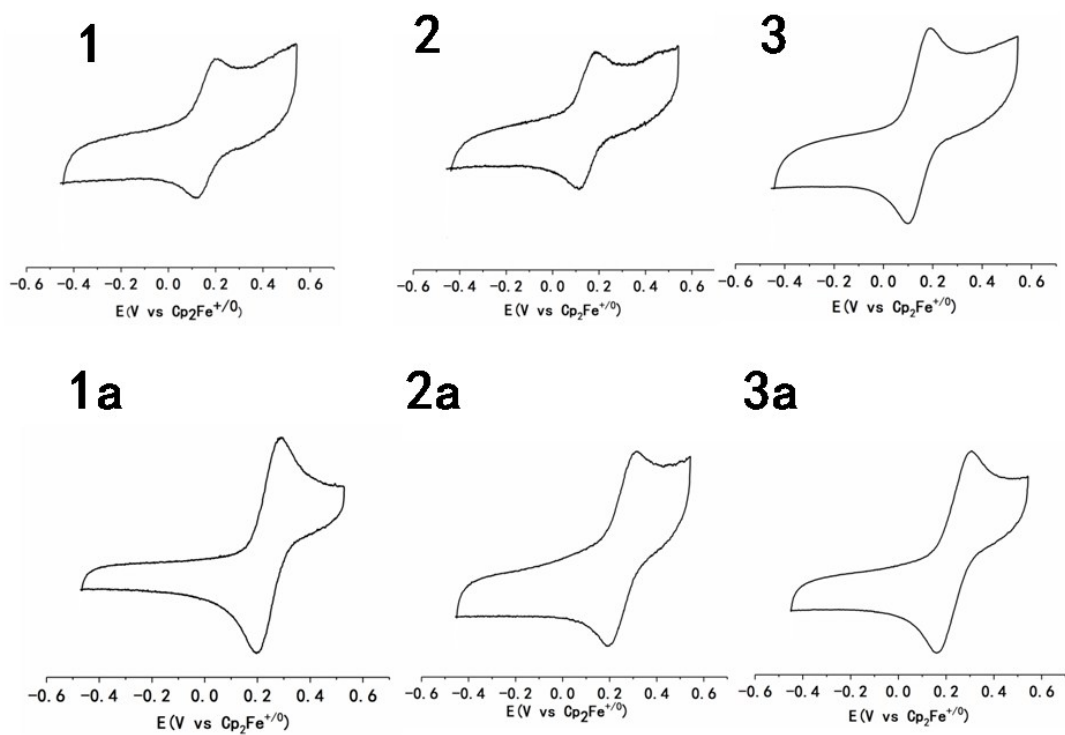

**Figure S3.** Cyclic voltammograms (vs  $\text{Cp}_2\text{Fe}^{+/0}$ ) for complexes **1-3** and **1a-3a** in 0.10 M acetonitrile solution of  $\text{Bu}_4\text{NPF}_6$  at a scan rate of  $100 \text{ mV s}^{-1}$ .

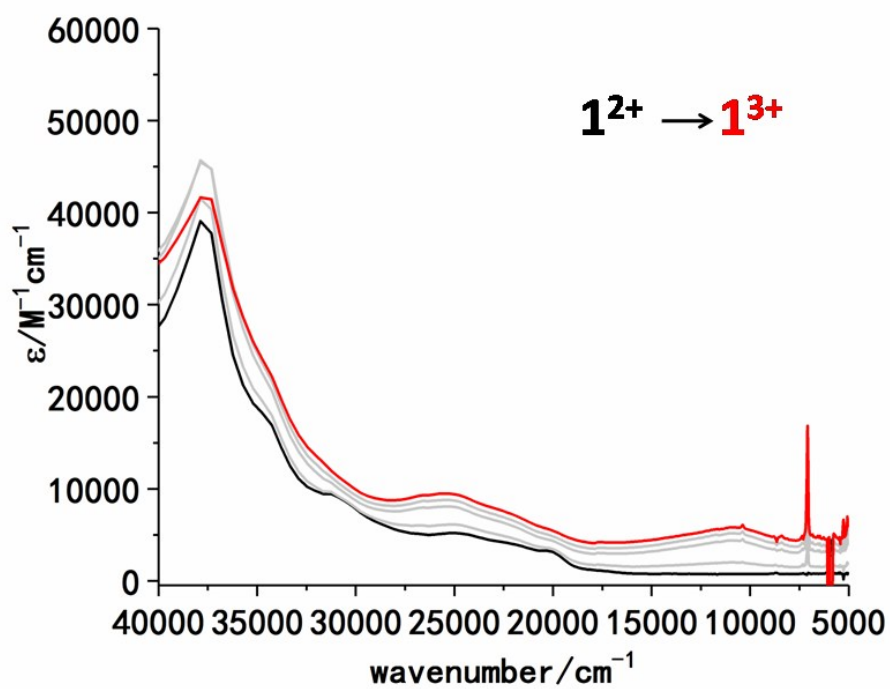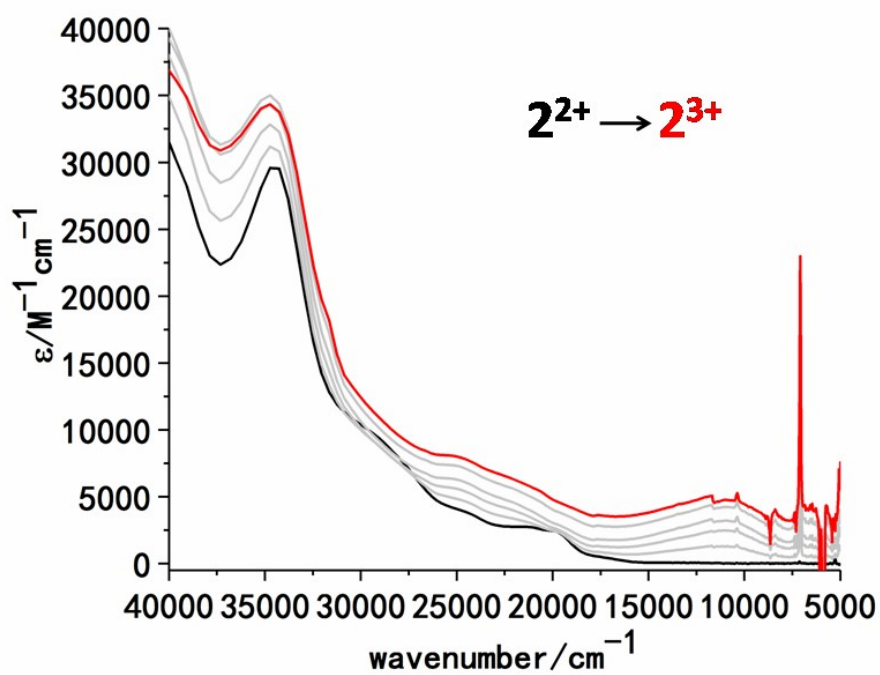

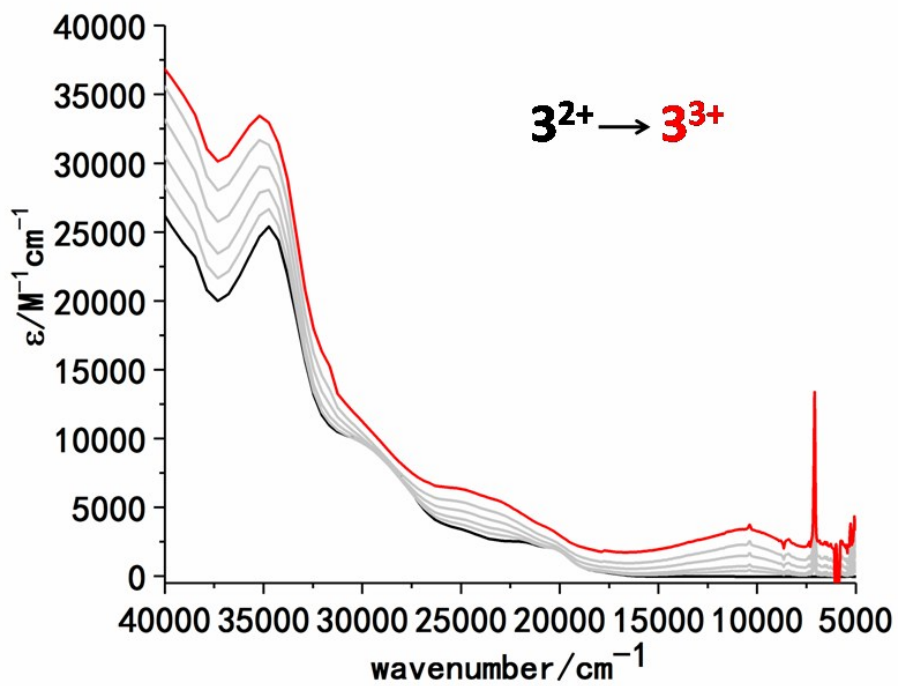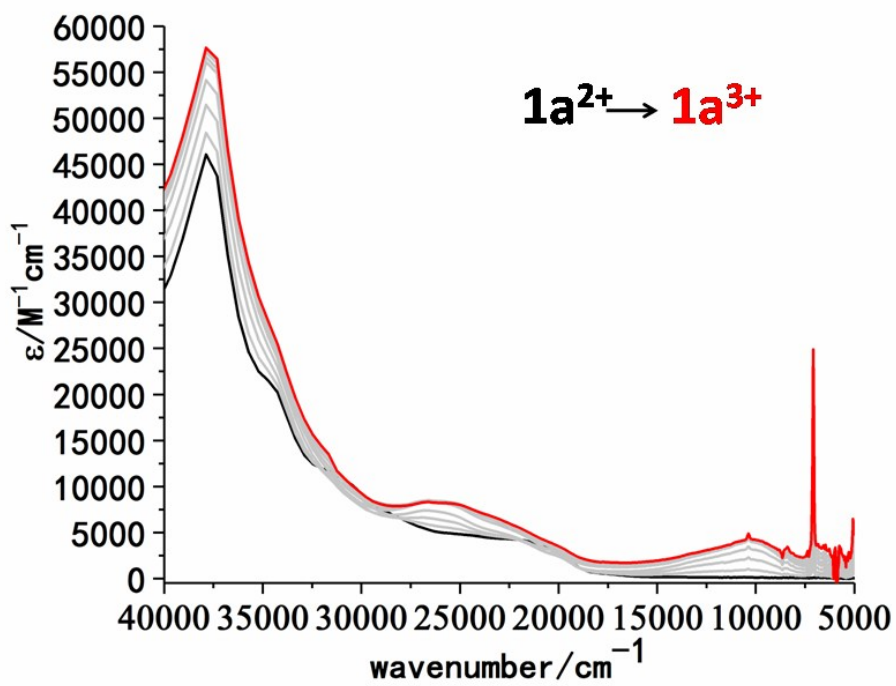

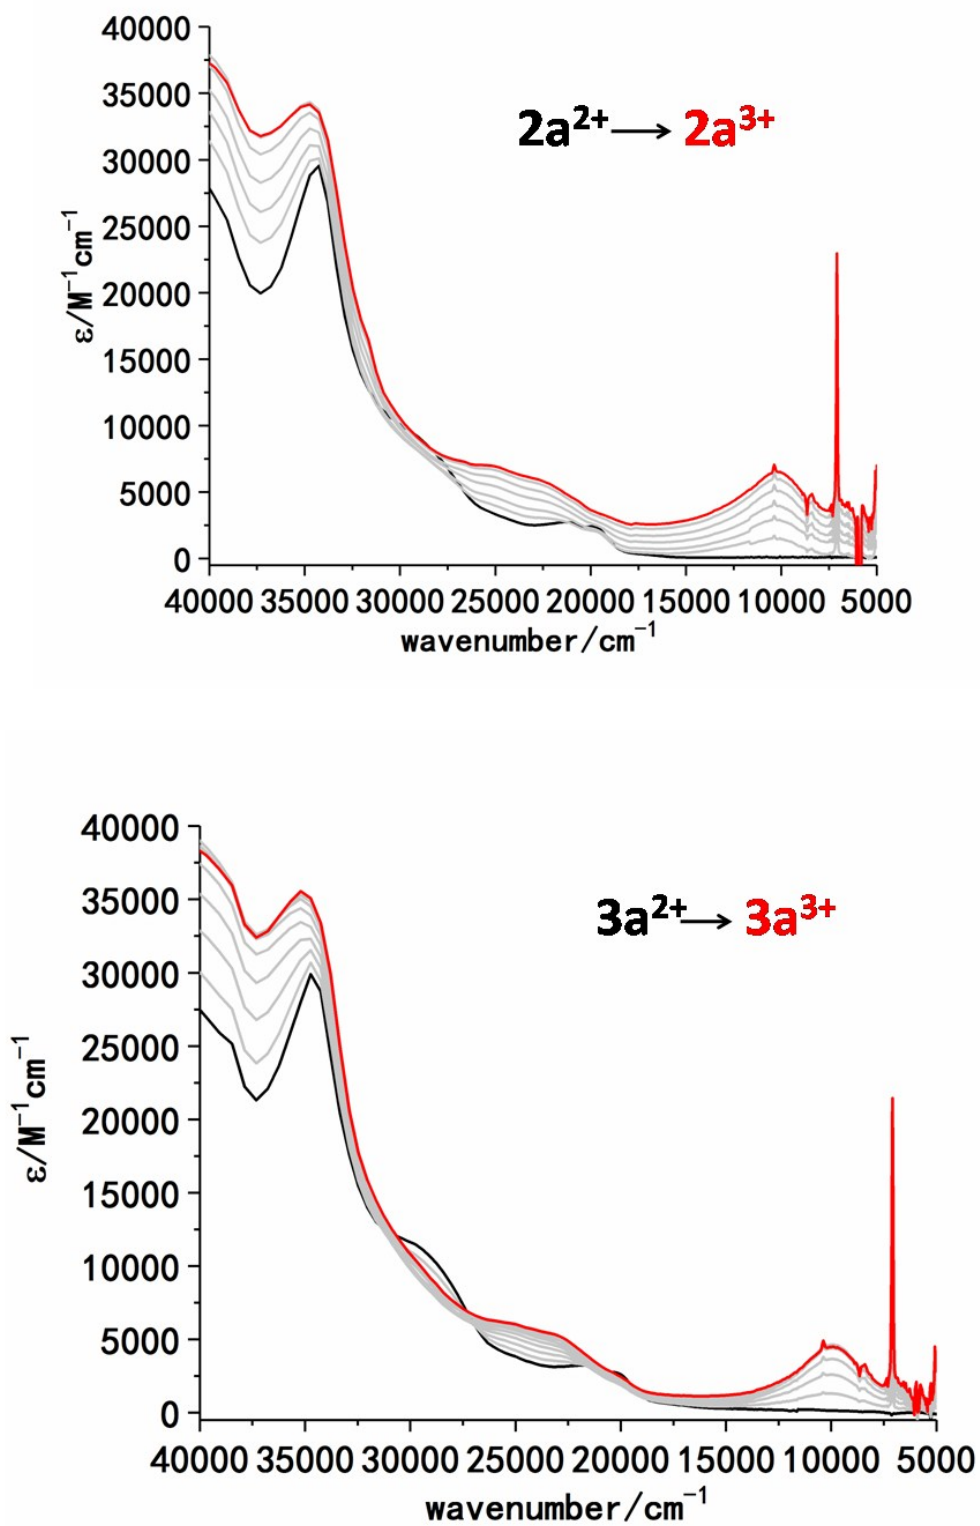

**Figure S4.** UV-Vis-NIR absorption spectra of complexes **1-3** and **1a-3a** were oxidized slowly by addition of ammonium ceric nitrate in the dichloromethane.



**Table S3.** Mulliken spin densities of mixed-valence species.

|                        | Ru1      | Ru2      |
|------------------------|----------|----------|
| <b>1<sup>3+</sup></b>  | 0.039458 | 0.844889 |
| <b>2<sup>3+</sup></b>  | 0.057586 | 0.828997 |
| <b>3<sup>3+</sup></b>  | 0.066070 | 0.820681 |
| <b>1a<sup>3+</sup></b> | 0.062427 | 0.820157 |
| <b>2a<sup>3+</sup></b> | 0.062986 | 0.819070 |
| <b>3a<sup>3+</sup></b> | 0.071993 | 0.808535 |

**Optimized crystallographic coordinates**Complex **1<sup>3+</sup>**

|    |           |           |           |
|----|-----------|-----------|-----------|
| Ru | -2.044446 | -0.336414 | 1.058279  |
| Ru | 3.056088  | 0.334820  | -0.011241 |
| P  | -3.057904 | 1.539413  | -0.320718 |
| P  | -2.807930 | -1.255699 | -1.161207 |
| N  | 2.705089  | 1.394060  | -1.806070 |
| N  | -0.087146 | -0.073911 | 0.408717  |
| N  | 3.724565  | 3.283473  | 0.225285  |
| N  | 3.559157  | -0.769778 | 1.718581  |
| N  | 5.141733  | 0.763443  | -0.357744 |
| C  | -0.152791 | 4.539763  | -0.481974 |
| H  | 0.754800  | 4.801408  | 0.055007  |
| N  | 3.001968  | 2.273776  | 0.857735  |
| N  | 3.366726  | -1.575833 | -0.838053 |
| C  | -2.047484 | 3.044089  | -0.809387 |
| C  | 2.466164  | 2.853353  | 1.954882  |
| H  | 1.833101  | 2.282563  | 2.616324  |
| N  | 5.474997  | 2.024292  | -0.837394 |
| C  | -3.203810 | 0.461380  | -1.882970 |
| H  | -2.416500 | 0.757003  | -2.581716 |
| H  | -4.166237 | 0.508598  | -2.397035 |
| N  | 3.454895  | 2.544218  | -2.044494 |
| C  | 6.839081  | 2.138810  | -1.027195 |
| H  | 7.300855  | 3.044102  | -1.394256 |
| C  | 3.709156  | -2.534035 | 0.097627  |
| C  | -1.615810 | -2.070319 | -2.347802 |

|   |           |           |           |
|---|-----------|-----------|-----------|
| C | 1.093446  | 0.046625  | 0.255361  |
| C | -1.691314 | -1.864458 | 2.795599  |
| C | -3.741282 | -0.729598 | 2.592358  |
| C | 3.801584  | -2.106766 | 1.462383  |
| C | 4.326661  | -2.531436 | 3.802215  |
| H | 4.625291  | -3.198951 | 4.605639  |
| C | 3.093914  | 3.126512  | -3.243932 |
| H | 3.563514  | 4.026067  | -3.614961 |
| C | 6.312490  | 0.097875  | -0.254620 |
| H | 6.338271  | -0.920841 | 0.099881  |
| C | -0.848143 | 3.361495  | -0.144620 |
| H | -0.462846 | 2.705504  | 0.630320  |
| C | 3.719924  | -0.323744 | 2.981765  |
| H | 3.564723  | 0.733122  | 3.155513  |
| C | 3.363473  | -1.924489 | -2.139929 |
| H | 3.116200  | -1.152689 | -2.856940 |
| C | -1.725945 | -1.833980 | -3.736414 |
| H | -2.454106 | -1.126977 | -4.126807 |
| C | -0.695447 | -3.025939 | -1.870411 |
| H | -0.604936 | -3.215335 | -0.803726 |
| C | 4.190396  | -3.028242 | 2.475327  |
| C | 1.876391  | 1.278277  | -2.866225 |
| H | 1.165359  | 0.467574  | -2.913525 |
| C | 7.400190  | 0.919100  | -0.663183 |
| H | 8.445858  | 0.655364  | -0.686224 |
| C | 3.645508  | 4.465631  | 0.933156  |
| H | 4.149070  | 5.366822  | 0.613937  |
| C | -0.922442 | -2.553447 | -4.640505 |
| H | -1.025219 | -2.381760 | -5.708346 |
| C | -2.543960 | 3.899733  | -1.819613 |
| H | -3.485001 | 3.682149  | -2.319441 |
| C | 0.094835  | -3.755646 | -2.778617 |
| H | 0.776239  | -4.516645 | -2.408825 |
| C | -0.644529 | 5.391590  | -1.487846 |
| H | -0.118602 | 6.310186  | -1.734474 |
| C | -1.504139 | -0.514892 | 3.293461  |
| C | -3.078759 | 1.540308  | 3.754084  |
| H | -2.244240 | 2.243589  | 3.659777  |
| H | -3.292238 | 1.432282  | 4.827739  |
| H | -3.962949 | 1.988040  | 3.294849  |
| C | 4.412571  | 3.001016  | -1.038192 |
| H | 4.864614  | 3.930529  | -1.393909 |
| C | 3.682977  | -3.234517 | -2.572644 |
| H | 3.679449  | -3.451527 | -3.635164 |

|   |           |           |           |
|---|-----------|-----------|-----------|
| C | 2.089881  | 2.336097  | -3.793059 |
| H | 1.581396  | 2.497978  | -4.730266 |
| C | -2.765921 | 0.191660  | 3.168940  |
| C | 4.005466  | -4.215940 | -1.636754 |
| H | 4.258079  | -5.224678 | -1.951622 |
| C | 4.384325  | -4.805252 | 0.792023  |
| H | 4.613529  | -5.832311 | 0.521131  |
| C | -5.225558 | -0.489558 | 2.529906  |
| H | -5.474735 | 0.504850  | 2.147798  |
| H | -5.650817 | -0.565437 | 3.541112  |
| H | -5.732939 | -1.233231 | 1.910805  |
| C | 4.025628  | -3.875585 | -0.254545 |
| C | 4.098065  | -1.177408 | 4.046659  |
| H | 4.217183  | -0.759696 | 5.040647  |
| C | 4.459246  | -4.398973 | 2.105144  |
| H | 4.745924  | -5.101977 | 2.882472  |
| C | -0.670727 | -2.966094 | 2.844720  |
| H | -0.862191 | -3.737714 | 2.092280  |
| H | -0.698749 | -3.460697 | 3.826773  |
| H | 0.345522  | -2.586026 | 2.696761  |
| C | -3.076117 | -2.002737 | 2.388086  |
| C | -4.743128 | 2.296658  | 0.019873  |
| C | 2.846775  | 4.220472  | 2.046428  |
| H | 2.581152  | 4.924815  | 2.819123  |
| C | -4.806860 | 3.322780  | 0.992484  |
| H | -3.906686 | 3.659124  | 1.501843  |
| C | -5.915706 | 1.925567  | -0.671420 |
| H | -5.903915 | 1.170175  | -1.450742 |
| C | -4.374517 | -2.276551 | -1.343746 |
| C | -1.838319 | 5.065596  | -2.162893 |
| H | -2.228625 | 5.725442  | -2.932574 |
| C | -0.263831 | 0.011675  | 3.957713  |
| H | -0.245710 | -0.298234 | 5.012492  |
| H | -0.232295 | 1.106299  | 3.942585  |
| H | 0.645790  | -0.374255 | 3.485642  |
| C | -5.610589 | -1.756022 | -0.899106 |
| H | -5.669188 | -0.773046 | -0.442735 |
| C | -3.741349 | -3.287920 | 1.989953  |
| H | -4.570421 | -3.132677 | 1.296306  |
| H | -4.154412 | -3.768432 | 2.889477  |
| H | -3.043350 | -3.998062 | 1.536349  |
| C | -0.017925 | -3.522735 | -4.163110 |
| H | 0.573755  | -4.103024 | -4.866152 |
| C | -4.327058 | -3.567518 | -1.913192 |

|   |           |           |           |
|---|-----------|-----------|-----------|
| H | -3.390975 | -3.988172 | -2.266704 |
| C | -6.028473 | 3.957130  | 1.275734  |
| H | -6.064683 | 4.752196  | 2.015189  |
| C | -7.199806 | 3.577233  | 0.589986  |
| H | -8.142594 | 4.072187  | 0.804056  |
| C | -7.137694 | 2.566898  | -0.386983 |
| H | -8.031923 | 2.284261  | -0.935331 |
| C | -6.788931 | -2.509526 | -1.043123 |
| H | -7.737927 | -2.097636 | -0.710486 |
| C | -5.509129 | -4.321235 | -2.047923 |
| H | -5.466088 | -5.310744 | -2.494083 |
| C | -6.741511 | -3.795490 | -1.617677 |
| H | -7.652089 | -4.376841 | -1.730076 |

#### Complex 2<sup>3+</sup>

|    |           |           |           |
|----|-----------|-----------|-----------|
| Ru | 1.962642  | -0.209314 | 1.145952  |
| Ru | -3.139984 | 0.036923  | -0.049812 |
| P  | 2.730698  | 1.609573  | -0.409245 |
| P  | 2.674077  | -1.226027 | -1.047416 |
| N  | -3.978547 | 2.275182  | -1.927951 |
| N  | -3.124760 | 2.007915  | -0.857397 |
| N  | -2.965205 | -0.486039 | -2.106244 |
| N  | -3.487505 | 0.490124  | 1.964279  |
| N  | -5.263160 | 0.085289  | -0.417972 |
| N  | 0.014855  | -0.039603 | 0.458448  |
| N  | -3.363031 | -1.870154 | 0.782317  |
| N  | -3.819390 | 0.144362  | -3.011843 |
| N  | -5.714005 | 0.638887  | -1.608761 |
| C  | 0.863986  | -3.574896 | -3.976803 |
| H  | 0.957486  | -3.710905 | -5.050736 |
| C  | -2.488323 | 3.173458  | -0.609208 |
| H  | -1.732911 | 3.233328  | 0.158766  |
| C  | -2.932212 | 4.192710  | -1.496204 |
| H  | -2.605299 | 5.219033  | -1.524646 |
| C  | 2.612438  | 0.460948  | -1.932931 |
| H  | 3.373442  | 0.632271  | -2.697496 |
| H  | 1.616963  | 0.567483  | -2.375172 |
| C  | -3.873098 | 3.593170  | -2.325350 |
| H  | -4.457023 | 4.000561  | -3.138072 |
| C  | 0.833376  | 4.830148  | -2.259140 |

|   |           |           |           |
|---|-----------|-----------|-----------|
| H | 0.689874  | 5.194402  | -3.272683 |
| C | 6.591705  | -2.012534 | -2.351843 |
| H | 7.381450  | -1.493348 | -2.887451 |
| C | 0.430718  | 5.615481  | -1.161269 |
| H | -0.013336 | 6.593914  | -1.325805 |
| C | -1.162562 | 0.002613  | 0.247336  |
| C | -3.643458 | -0.591253 | 2.803328  |
| C | 5.559248  | 1.409845  | -0.104926 |
| H | 5.378404  | 0.358567  | 0.088752  |
| C | 1.686279  | 3.123793  | -0.733929 |
| C | 1.521389  | -2.413869 | -1.931212 |
| C | 4.345568  | -2.010648 | -1.394340 |
| C | 4.743616  | 3.654604  | -0.606536 |
| H | 3.937258  | 4.352087  | -0.806537 |
| C | 3.673844  | -0.868177 | 2.580595  |
| C | -6.375828 | -0.319985 | 0.233058  |
| H | -6.309325 | -0.792965 | 1.200446  |
| C | 4.484404  | 2.286157  | -0.371649 |
| C | -4.735801 | 1.183004  | -2.540035 |
| H | -5.271477 | 1.583008  | -3.404798 |
| C | -7.090904 | 0.578643  | -1.695225 |
| H | -7.637087 | 0.958854  | -2.546476 |
| C | -3.616031 | 1.745407  | 2.471410  |
| H | -3.517153 | 2.562383  | 1.769501  |
| C | -3.571468 | -4.278029 | 0.683776  |
| H | -3.588102 | -5.177438 | 0.077469  |
| C | 6.772518  | -3.347940 | -1.948056 |
| H | 7.703257  | -3.863039 | -2.167488 |
| C | 6.067970  | 4.132874  | -0.586451 |
| H | 6.259544  | 5.186240  | -0.770018 |
| C | -2.524368 | -1.196104 | -4.231886 |
| H | -2.076137 | -1.730008 | -5.054418 |
| C | 1.833780  | 0.334094  | 3.414157  |
| C | 6.880103  | 1.891003  | -0.093665 |
| H | 7.702537  | 1.208169  | 0.102537  |
| C | -3.561919 | -0.272738 | -4.302836 |
| H | -4.119202 | 0.096151  | -5.151912 |
| C | -3.765333 | -4.333517 | 2.076704  |
| H | -3.925460 | -5.283087 | 2.577693  |
| C | -3.371549 | -3.031357 | 0.075144  |
| H | -3.229281 | -2.947266 | -0.993939 |
| C | -3.575737 | -1.910114 | 2.142391  |
| C | 2.543972  | -1.787791 | 2.698021  |
| C | 1.462999  | 3.588396  | -2.047545 |

|   |           |           |           |
|---|-----------|-----------|-----------|
| H | 1.805787  | 3.017991  | -2.907293 |
| C | 5.384182  | -1.341879 | -2.074710 |
| H | 5.279493  | -0.312907 | -2.403450 |
| C | 7.138423  | 3.255351  | -0.333221 |
| H | 8.158487  | 3.628399  | -0.320086 |
| C | -2.181839 | -1.293236 | -2.854555 |
| H | -1.413768 | -1.892308 | -2.390884 |
| C | -7.541683 | -0.031669 | -0.528769 |
| H | -8.565697 | -0.240020 | -0.261421 |
| C | 0.667726  | -3.250347 | -1.183295 |
| H | 0.591508  | -3.128460 | -0.106075 |
| C | 1.012267  | 1.422634  | 4.045827  |
| H | 1.327558  | 2.418811  | 3.718856  |
| H | 1.126911  | 1.394084  | 5.139427  |
| H | -0.054483 | 1.310417  | 3.824970  |
| C | 4.107769  | 1.634501  | 3.255527  |
| H | 4.915914  | 1.708391  | 2.524037  |
| H | 4.573449  | 1.561624  | 4.249575  |
| H | 3.542305  | 2.571044  | 3.233462  |
| C | -3.883581 | 1.984677  | 3.826288  |
| H | -3.988468 | 3.003783  | 4.182860  |
| C | -0.070599 | -4.261229 | -1.830861 |
| H | -0.694716 | -4.932653 | -1.246695 |
| C | -3.768603 | -3.135210 | 2.808422  |
| H | -3.937998 | -3.160078 | 3.878647  |
| C | 3.233641  | 0.432414  | 3.036699  |
| C | -3.905242 | -0.410457 | 4.174860  |
| H | -4.032591 | -1.265268 | 4.829007  |
| C | 5.098807  | -1.287875 | 2.335501  |
| H | 5.207239  | -1.943464 | 1.465517  |
| H | 5.466555  | -1.846393 | 3.208273  |
| H | 5.761073  | -0.428743 | 2.205619  |
| C | 1.415393  | -1.042028 | 3.224217  |
| C | 5.735140  | -4.019291 | -1.269905 |
| H | 5.862474  | -5.055620 | -0.969959 |
| C | 4.526582  | -3.356644 | -0.996349 |
| H | 3.723140  | -3.905429 | -0.510291 |
| C | -4.024259 | 0.887601  | 4.696666  |
| H | -4.236074 | 1.038588  | 5.750511  |
| C | 1.258692  | 3.901007  | 0.365105  |
| H | 1.440838  | 3.561699  | 1.382336  |
| C | 0.637087  | 5.145993  | 0.151632  |
| H | 0.346208  | 5.758155  | 1.001239  |
| C | 1.616830  | -2.576580 | -3.331319 |

|   |           |           |           |
|---|-----------|-----------|-----------|
| H | 2.295197  | -1.960978 | -3.917862 |
| C | 2.623633  | -3.281290 | 2.543543  |
| H | 1.667946  | -3.724182 | 2.244122  |
| H | 2.903714  | -3.736728 | 3.504790  |
| H | 3.386095  | -3.574891 | 1.817109  |
| C | 0.027725  | -4.426961 | -3.226088 |
| H | -0.521724 | -5.222679 | -3.721748 |
| C | 0.093624  | -1.621964 | 3.639097  |
| H | -0.721617 | -0.902901 | 3.514268  |
| H | 0.129819  | -1.901657 | 4.701993  |
| H | -0.152537 | -2.525262 | 3.072076  |

Complex  $3^{3+}$

|   |           |           |           |
|---|-----------|-----------|-----------|
| C | -3.337970 | -2.822855 | -0.488689 |
| H | -3.097800 | -2.665521 | -1.531860 |
| C | -3.641708 | -4.099152 | -0.004478 |
| H | -3.637401 | -4.942314 | -0.688528 |
| C | -3.969792 | -4.281999 | 1.359711  |
| C | -3.972396 | -3.128250 | 2.172037  |
| H | -4.231397 | -3.223153 | 3.220859  |
| C | -3.668229 | -1.864972 | 1.634746  |
| C | -3.721672 | -0.603379 | 2.404314  |
| C | -4.072839 | -0.524635 | 3.764142  |
| H | -4.290240 | -1.429476 | 4.321085  |
| C | -4.169416 | 0.721730  | 4.418089  |
| C | -3.891138 | 1.871184  | 3.640985  |
| H | -3.958973 | 2.862997  | 4.077514  |
| C | -3.538502 | 1.739156  | 2.294528  |
| H | -3.339247 | 2.610866  | 1.685695  |
| C | -4.335661 | -5.640177 | 1.909171  |
| H | -4.214875 | -5.688869 | 2.995920  |
| H | -3.729685 | -6.434378 | 1.459310  |
| H | -5.386007 | -5.874013 | 1.685489  |
| C | -4.582226 | 0.830904  | 5.866404  |
| H | -3.986350 | 1.580988  | 6.398795  |
| H | -4.485681 | -0.122854 | 6.394246  |
| H | -5.632359 | 1.145178  | 5.943696  |
| C | -4.400196 | 1.651455  | -2.814607 |
| H | -4.870761 | 2.143542  | -3.669690 |
| C | -3.179921 | 0.302612  | -4.629500 |
| H | -3.675733 | 0.762053  | -5.472457 |

|   |           |           |           |
|---|-----------|-----------|-----------|
| C | -2.178995 | -0.661624 | -4.581826 |
| H | -1.702093 | -1.141215 | -5.421500 |
| C | -1.918546 | -0.885701 | -3.201125 |
| H | -1.196690 | -1.547337 | -2.748613 |
| C | -6.820172 | 1.075361  | -2.153442 |
| H | -7.302143 | 1.546043  | -2.998189 |
| C | -7.358972 | 0.390171  | -1.068722 |
| H | -8.403601 | 0.202764  | -0.876176 |
| C | -6.249797 | -0.007205 | -0.271804 |
| H | -6.254520 | -0.560628 | 0.654152  |
| C | -3.474164 | 4.000609  | -2.343184 |
| H | -3.996623 | 4.497137  | -3.148086 |
| C | -2.566513 | 4.492358  | -1.412492 |
| H | -2.209022 | 5.505482  | -1.330559 |
| C | -2.205733 | 3.384605  | -0.596391 |
| H | -1.495444 | 3.350748  | 0.215128  |
| C | -1.040740 | 0.090639  | 0.052564  |
| C | 1.721964  | -0.107723 | 3.412702  |
| C | 1.276360  | -1.428415 | 3.010284  |
| C | 2.417057  | -2.143246 | 2.469305  |
| C | 3.580866  | -1.262800 | 2.555106  |
| C | 3.147857  | -0.016041 | 3.149477  |
| C | 0.885654  | 0.920722  | 4.120476  |
| H | 1.279103  | 1.932954  | 3.985140  |
| H | 0.878764  | 0.721461  | 5.202230  |
| H | -0.154220 | 0.907896  | 3.776888  |
| C | -0.091206 | -2.002133 | 3.247257  |
| H | -0.872593 | -1.242368 | 3.151301  |
| H | -0.148775 | -2.411768 | 4.266178  |
| H | -0.317588 | -2.817839 | 2.553494  |
| C | 2.462074  | -3.605971 | 2.123206  |
| H | 1.513162  | -3.968511 | 1.714100  |
| H | 2.668506  | -4.193139 | 3.030144  |
| H | 3.257811  | -3.832524 | 1.408134  |
| C | 5.005495  | -1.707652 | 2.354679  |
| H | 5.163658  | -2.213570 | 1.396710  |
| H | 5.277213  | -2.421403 | 3.145435  |
| H | 5.707348  | -0.873302 | 2.425467  |
| C | 4.037584  | 1.114629  | 3.583242  |
| H | 4.907547  | 1.239359  | 2.934755  |
| H | 4.411886  | 0.908249  | 4.596839  |
| H | 3.506790  | 2.070814  | 3.624340  |
| C | 2.867333  | 0.657659  | -1.819789 |
| H | 1.900865  | 0.853144  | -2.294322 |



|   |           |           |           |
|---|-----------|-----------|-----------|
| H | 3.673794  | 0.887611  | -2.519795 |
| C | 4.701232  | 2.223766  | 0.050174  |
| C | 5.727784  | 1.301852  | 0.351709  |
| H | 5.507730  | 0.247060  | 0.468742  |
| C | 7.055729  | 1.740632  | 0.495918  |
| H | 7.840580  | 1.022663  | 0.718962  |
| C | 7.369286  | 3.106744  | 0.354843  |
| H | 8.394282  | 3.446857  | 0.471465  |
| C | 6.346889  | 4.029197  | 0.065279  |
| H | 6.580645  | 5.084500  | -0.042819 |
| C | 5.016542  | 3.594162  | -0.087087 |
| H | 4.248138  | 4.326399  | -0.310257 |
| C | 1.952403  | 3.188972  | -0.372486 |
| C | 1.481841  | 3.854907  | 0.780498  |
| H | 1.594974  | 3.401502  | 1.762515  |
| C | 0.903606  | 5.133950  | 0.672180  |
| H | 0.578536  | 5.658021  | 1.567029  |
| C | 0.784370  | 5.749996  | -0.589916 |
| H | 0.374370  | 6.753598  | -0.668883 |
| C | 1.229558  | 5.076615  | -1.744278 |
| H | 1.152972  | 5.552697  | -2.717963 |
| C | 1.814592  | 3.800112  | -1.637067 |
| H | 2.188943  | 3.314983  | -2.535251 |
| C | 4.505857  | -1.902285 | -1.468206 |
| C | 4.626371  | -3.298904 | -1.271841 |
| H | 3.773070  | -3.891564 | -0.949801 |
| C | 5.843311  | -3.948616 | -1.539171 |
| H | 5.924485  | -5.022432 | -1.395915 |
| C | 6.950001  | -3.213377 | -2.009667 |
| H | 7.887652  | -3.717506 | -2.225187 |
| C | 6.830336  | -1.826337 | -2.212240 |
| H | 7.674841  | -1.255446 | -2.587716 |
| C | 5.614507  | -1.169087 | -1.940110 |
| H | 5.557794  | -0.098607 | -2.109122 |
| C | 1.708637  | -2.178289 | -2.205512 |
| C | 0.796625  | -3.062134 | -1.592800 |
| H | 0.663837  | -3.046145 | -0.514284 |
| C | 0.073978  | -3.983092 | -2.377364 |
| H | -0.598417 | -4.690291 | -1.898445 |
| C | 0.248035  | -4.012346 | -3.774771 |
| H | -0.289994 | -4.739224 | -4.377205 |
| C | 1.144322  | -3.113657 | -4.389382 |
| H | 1.295901  | -3.145403 | -5.464848 |
| C | 1.880909  | -2.204586 | -3.607269 |

|    |           |           |           |
|----|-----------|-----------|-----------|
| H  | 2.605639  | -1.553423 | -4.090742 |
| N  | -3.341824 | -1.719362 | 0.305799  |
| N  | -3.444669 | 0.531287  | 1.676028  |
| N  | -3.496323 | 0.619846  | -3.323134 |
| N  | -2.716526 | -0.115648 | -2.429943 |
| N  | -5.449340 | 1.071618  | -1.987523 |
| N  | -5.088002 | 0.404269  | -0.825014 |
| N  | -3.641112 | 2.657202  | -2.071480 |
| N  | -2.860544 | 2.268041  | -0.982942 |
| N  | 0.119813  | -0.025128 | 0.324691  |
| P  | 2.934026  | 1.612213  | -0.163280 |
| P  | 2.830521  | -1.120414 | -1.138057 |
| Ru | -2.989630 | 0.237571  | -0.348126 |
| Ru | 2.005860  | -0.351743 | 1.107314  |

Complex **1a**<sup>3+</sup>

|   |          |           |           |
|---|----------|-----------|-----------|
| C | 2.958101 | 2.834025  | 1.217291  |
| H | 3.119422 | 3.190494  | 0.208670  |
| C | 2.848585 | 3.748146  | 2.293161  |
| H | 2.920273 | 4.810647  | 2.088840  |
| C | 2.660877 | 3.273944  | 3.590583  |
| H | 2.583356 | 3.961316  | 4.428315  |
| C | 2.591791 | 1.869503  | 3.811976  |
| C | 2.440929 | 1.272148  | 5.119166  |
| H | 2.349542 | 1.925132  | 5.982908  |
| C | 2.436401 | -0.095508 | 5.276895  |
| H | 2.342096 | -0.534072 | 6.266644  |
| C | 2.580409 | -0.975799 | 4.139893  |
| C | 2.640152 | -2.394099 | 4.244114  |
| H | 2.563529 | -2.871608 | 5.216963  |
| C | 2.816585 | -3.152680 | 3.087975  |
| H | 2.881375 | -4.234185 | 3.130909  |
| C | 2.924749 | -2.508969 | 1.831429  |
| H | 3.073501 | -3.086649 | 0.928836  |
| C | 2.707572 | 1.017845  | 2.678178  |
| C | 2.699783 | -0.405586 | 2.841877  |
| C | 5.382996 | -0.290554 | -2.208874 |
| H | 6.166557 | -0.385555 | -2.965056 |
| C | 4.700194 | 1.775287  | -3.582194 |
| H | 5.498775 | 1.709002  | -4.307064 |
| C | 3.649856 | 2.681532  | -3.473078 |

|   |           |           |           |
|---|-----------|-----------|-----------|
| H | 3.447999  | 3.514295  | -4.128281 |
| C | 2.912913  | 2.284804  | -2.322903 |
| H | 2.020528  | 2.721708  | -1.902595 |
| C | 4.642809  | -2.589564 | -3.094911 |
| H | 5.438291  | -2.702501 | -3.817437 |
| C | 3.571329  | -3.423329 | -2.789863 |
| H | 3.344980  | -4.373420 | -3.247634 |
| C | 2.851662  | -2.767413 | -1.752682 |
| H | 1.951011  | -3.079412 | -1.246842 |
| C | 7.358571  | -0.127552 | -0.567355 |
| H | 8.145345  | -0.220083 | -1.302224 |
| C | 7.423330  | 0.028478  | 0.813471  |
| H | 8.315546  | 0.087125  | 1.416804  |
| C | 6.074190  | 0.094585  | 1.260153  |
| H | 5.707249  | 0.213203  | 2.267864  |
| C | 1.114855  | -0.046740 | -0.415425 |
| C | -1.992830 | -1.100098 | -3.352026 |
| C | -3.288693 | -1.371985 | -2.760646 |
| C | -3.953809 | -0.099587 | -2.520865 |
| C | -3.079517 | 0.952970  | -3.025512 |
| C | -1.863750 | 0.332995  | -3.512984 |
| C | -1.021377 | -2.116107 | -3.884981 |
| H | 0.019609  | -1.819262 | -3.713418 |
| H | -1.153483 | -2.218895 | -4.972059 |
| H | -1.180124 | -3.108684 | -3.453081 |
| C | -3.919280 | -2.728872 | -2.627914 |
| H | -3.184672 | -3.520729 | -2.451162 |
| H | -4.438573 | -2.971859 | -3.566779 |
| H | -4.661961 | -2.768467 | -1.828605 |
| C | -5.398078 | 0.079593  | -2.137346 |
| H | -5.776183 | -0.772407 | -1.567741 |
| H | -6.015101 | 0.169449  | -3.043108 |
| H | -5.560144 | 0.982601  | -1.540139 |
| C | -3.477486 | 2.384721  | -3.256105 |
| H | -4.369835 | 2.651202  | -2.686691 |
| H | -3.724210 | 2.519465  | -4.319263 |
| H | -2.682486 | 3.098448  | -3.017370 |
| C | -0.737078 | 1.029390  | -4.224005 |
| H | -0.740392 | 2.107676  | -4.036998 |
| H | -0.839543 | 0.891748  | -5.310209 |
| H | 0.241051  | 0.627230  | -3.936904 |
| C | -1.827014 | 0.870267  | 2.103240  |
| H | -0.740263 | 0.839402  | 1.981253  |
| H | -2.055951 | 1.523144  | 2.953399  |

|   |           |           |           |
|---|-----------|-----------|-----------|
| C | -2.387308 | -0.545600 | 2.338814  |
| H | -3.370078 | -0.519034 | 2.816561  |
| H | -1.717768 | -1.104058 | 3.000385  |
| C | -1.441537 | 3.228998  | 0.277554  |
| C | -0.666601 | 3.421726  | -0.883686 |
| H | -0.617278 | 2.637889  | -1.634199 |
| C | 0.022716  | 4.634631  | -1.081146 |
| H | 0.578124  | 4.803765  | -2.001358 |
| C | -0.044473 | 5.653604  | -0.112088 |
| H | 0.465820  | 6.598948  | -0.276297 |
| C | -0.804513 | 5.456368  | 1.058199  |
| H | -0.875120 | 6.245756  | 1.801401  |
| C | -1.508251 | 4.253463  | 1.249055  |
| H | -2.130651 | 4.139317  | 2.133088  |
| C | -4.154602 | 2.389265  | 0.933609  |
| C | -4.707817 | 3.377471  | 0.086511  |
| H | -4.160213 | 3.728687  | -0.782606 |
| C | -5.948631 | 3.963640  | 0.390010  |
| H | -6.357157 | 4.729486  | -0.263380 |
| C | -6.651953 | 3.575680  | 1.547515  |
| H | -7.607809 | 4.033411  | 1.785318  |
| C | -6.097551 | 2.608028  | 2.405477  |
| H | -6.620848 | 2.321364  | 3.313495  |
| C | -4.856496 | 2.015664  | 2.101103  |
| H | -4.449113 | 1.293146  | 2.801165  |
| C | -4.315067 | -2.312624 | 0.902063  |
| C | -5.421406 | -1.453382 | 1.092377  |
| H | -5.294232 | -0.374810 | 1.110391  |
| C | -6.713008 | -1.985467 | 1.252681  |
| H | -7.555631 | -1.316996 | 1.406803  |
| C | -6.915823 | -3.379304 | 1.211849  |
| H | -7.913439 | -3.790036 | 1.338057  |
| C | -5.818587 | -4.236388 | 1.006208  |
| H | -5.966938 | -5.312018 | 0.971795  |
| C | -4.522352 | -3.708593 | 0.850562  |
| H | -3.692763 | -4.392123 | 0.701078  |
| C | -1.464774 | -3.054171 | 0.910207  |
| C | -1.374402 | -3.735492 | 2.145260  |
| H | -1.913437 | -3.379445 | 3.019851  |
| C | -0.625711 | -4.922577 | 2.248348  |
| H | -0.584298 | -5.451470 | 3.196594  |
| C | 0.027936  | -5.448260 | 1.116194  |
| H | 0.573088  | -6.385672 | 1.187882  |
| C | -0.057431 | -4.770499 | -0.115164 |

|    |           |           |           |
|----|-----------|-----------|-----------|
| H  | 0.415529  | -5.194188 | -0.998493 |
| C  | -0.795528 | -3.574754 | -0.215845 |
| H  | -0.865094 | -3.060057 | -1.169167 |
| N  | 2.880807  | 1.499860  | 1.394258  |
| N  | 2.861953  | -1.168762 | 1.700757  |
| N  | 4.578256  | 0.889244  | -2.530600 |
| N  | 3.472293  | 1.200479  | -1.742522 |
| N  | 4.549767  | -1.493175 | -2.261188 |
| N  | 3.441461  | -1.597335 | -1.423207 |
| N  | 6.019052  | -0.150830 | -0.905710 |
| N  | 5.217178  | -0.013755 | 0.221829  |
| N  | -0.055226 | -0.066993 | -0.662454 |
| P  | -2.470248 | 1.669427  | 0.500906  |
| P  | -2.596091 | -1.565477 | 0.722997  |
| Ru | 3.077691  | -0.021094 | -0.052547 |
| Ru | -2.060210 | -0.094839 | -1.219230 |

Complex **2a**<sup>3+</sup>

|   |          |           |           |
|---|----------|-----------|-----------|
| C | 3.628956 | 2.526043  | 1.528117  |
| H | 3.489304 | 3.022288  | 0.577202  |
| C | 3.921978 | 3.256235  | 2.688017  |
| H | 4.012414 | 4.335995  | 2.636080  |
| C | 4.108168 | 2.565087  | 3.899699  |
| H | 4.337171 | 3.100964  | 4.815486  |
| C | 4.013834 | 1.164164  | 3.901328  |
| H | 4.179259 | 0.616101  | 4.821630  |
| C | 3.731162 | 0.481609  | 2.702985  |
| C | 3.706126 | -0.989674 | 2.577301  |
| C | 3.960840 | -1.874913 | 3.641934  |
| H | 4.141245 | -1.497328 | 4.641745  |
| C | 4.007824 | -3.257613 | 3.402102  |
| H | 4.215857 | -3.948637 | 4.212964  |
| C | 3.801864 | -3.726401 | 2.091275  |
| H | 3.856279 | -4.784102 | 1.856653  |
| C | 3.537434 | -2.800493 | 1.072854  |
| H | 3.381841 | -3.122804 | 0.052162  |
| C | 4.525139 | 0.210791  | -2.997511 |
| H | 4.995574 | 0.285356  | -3.981361 |
| C | 6.950762 | 0.095614  | -2.145242 |
| H | 7.430825 | 0.169393  | -3.110478 |
| C | 7.494757 | -0.020622 | -0.869899 |

|   |           |           |           |
|---|-----------|-----------|-----------|
| H | 8.541945  | -0.059475 | -0.614161 |
| C | 6.386856  | -0.076707 | 0.020379  |
| H | 6.396163  | -0.166351 | 1.095614  |
| C | 3.494682  | 2.476587  | -3.636148 |
| H | 3.995051  | 2.569807  | -4.589327 |
| C | 2.573568  | 3.310172  | -3.010797 |
| H | 2.181371  | 4.240626  | -3.389181 |
| C | 2.261437  | 2.685927  | -1.771392 |
| H | 1.572721  | 3.013475  | -1.008122 |
| C | 3.408271  | -1.873025 | -4.005635 |
| H | 3.906079  | -1.824054 | -4.963446 |
| C | 2.452946  | -2.762622 | -3.525295 |
| H | 2.025230  | -3.599624 | -4.053479 |
| C | 2.163790  | -2.344938 | -2.196608 |
| H | 1.462574  | -2.767775 | -1.494098 |
| C | 1.165623  | -0.013293 | 0.240529  |
| C | -1.770221 | 0.469491  | 3.340034  |
| C | -1.916789 | -0.966688 | 3.229226  |
| C | -3.224808 | -1.243833 | 2.668349  |
| C | -3.878992 | 0.026668  | 2.393062  |
| C | -2.986502 | 1.086658  | 2.850788  |
| C | -0.626431 | 1.178125  | 4.010329  |
| H | 0.341735  | 0.744061  | 3.736031  |
| H | -0.609385 | 2.245749  | 3.771258  |
| H | -0.725042 | 1.094436  | 5.102432  |
| C | -0.949194 | -1.979053 | 3.775570  |
| H | 0.092496  | -1.690714 | 3.594184  |
| H | -1.078041 | -2.064593 | 4.864597  |
| H | -1.113760 | -2.976887 | 3.358288  |
| C | -3.869284 | -2.598397 | 2.596364  |
| H | -4.652744 | -2.648388 | 1.838156  |
| H | -3.149416 | -3.399222 | 2.398845  |
| H | -4.340584 | -2.817952 | 3.565883  |
| C | -5.322945 | 0.206094  | 2.009395  |
| H | -5.697245 | -0.641283 | 1.429931  |
| H | -5.943337 | 0.287183  | 2.913605  |
| H | -5.483803 | 1.113030  | 1.418334  |
| C | -3.361046 | 2.530868  | 3.040935  |
| H | -4.277132 | 2.783810  | 2.503997  |
| H | -3.556462 | 2.711086  | 4.107911  |
| H | -2.571985 | 3.226059  | 2.736363  |
| C | -1.823783 | 0.806685  | -2.291506 |
| H | -2.057867 | 1.430282  | -3.161980 |
| H | -0.735775 | 0.771252  | -2.182973 |

|   |           |           |           |
|---|-----------|-----------|-----------|
| C | -2.397732 | -0.612806 | -2.467990 |
| H | -1.742252 | -1.200779 | -3.118168 |
| H | -3.387373 | -0.595757 | -2.931725 |
| C | -1.410850 | 3.225623  | -0.543187 |
| C | -0.601043 | 3.432499  | 0.592308  |
| H | -0.533520 | 2.663196  | 1.355385  |
| C | 0.110590  | 4.639117  | 0.744184  |
| H | 0.705286  | 4.807679  | 1.638702  |
| C | 0.026335  | 5.640187  | -0.243017 |
| H | 0.556694  | 6.580074  | -0.116259 |
| C | -0.772882 | 5.430508  | -1.385445 |
| H | -0.856587 | 6.206482  | -2.141341 |
| C | -1.495475 | 4.232047  | -1.532404 |
| H | -2.142895 | 4.106695  | -2.396592 |
| C | -4.132963 | 2.371965  | -1.149109 |
| C | -4.684759 | 3.373336  | -0.316842 |
| H | -4.134973 | 3.738532  | 0.544986  |
| C | -5.927025 | 3.953159  | -0.626241 |
| H | -6.334650 | 4.729253  | 0.015524  |
| C | -6.633310 | 3.545121  | -1.775041 |
| H | -7.590441 | 3.997716  | -2.017483 |
| C | -6.080203 | 2.564297  | -2.618769 |
| H | -6.605522 | 2.262649  | -3.520729 |
| C | -4.837480 | 1.978395  | -2.308510 |
| H | -4.430446 | 1.246436  | -2.999075 |
| C | -1.457187 | -3.066618 | -0.974560 |
| C | -0.688130 | -3.500547 | 0.124071  |
| H | -0.683137 | -2.923573 | 1.043047  |
| C | 0.067470  | -4.687085 | 0.038619  |
| H | 0.631609  | -5.031399 | 0.901678  |
| C | 0.065988  | -5.443647 | -1.149342 |
| H | 0.628261  | -6.371589 | -1.208473 |
| C | -0.691350 | -5.006028 | -2.255286 |
| H | -0.715652 | -5.596232 | -3.167276 |
| C | -1.453920 | -3.826552 | -2.167561 |
| H | -2.067901 | -3.533457 | -3.015850 |
| C | -4.305125 | -2.325185 | -0.936014 |
| C | -4.514131 | -3.710568 | -0.757285 |
| H | -3.684785 | -4.378036 | -0.546291 |
| C | -5.810493 | -4.249588 | -0.863436 |
| H | -5.959493 | -5.317633 | -0.732093 |
| C | -6.907464 | -3.413524 | -1.144001 |
| H | -7.905592 | -3.832943 | -1.231549 |
| C | -6.703446 | -2.029501 | -1.311534 |

|    |           |           |           |
|----|-----------|-----------|-----------|
| H  | -7.545573 | -1.377190 | -1.525700 |
| C  | -5.411107 | -1.485859 | -1.202635 |
| H  | -5.285088 | -0.413615 | -1.321839 |
| N  | 3.522453  | 1.170471  | 1.528513  |
| N  | 3.478000  | -1.461973 | 1.303629  |
| N  | 5.577603  | 0.105959  | -1.995650 |
| N  | 5.220422  | -0.000475 | -0.657297 |
| N  | 3.714717  | 1.410514  | -2.786951 |
| N  | 2.953333  | 1.533750  | -1.624183 |
| N  | 3.669771  | -0.975856 | -2.989541 |
| N  | 2.901751  | -1.263349 | -1.861301 |
| N  | -0.004705 | -0.027171 | 0.487703  |
| P  | -2.445800 | 1.663450  | -0.710609 |
| P  | -2.584343 | -1.571349 | -0.812634 |
| Ru | 3.125342  | -0.004774 | -0.156696 |
| Ru | -2.006746 | -0.036287 | 1.065685  |

Complex **3a**<sup>3+</sup>

|    |           |           |           |
|----|-----------|-----------|-----------|
| Ru | 2.977034  | 0.010356  | -0.500270 |
| Ru | -2.046859 | -0.037681 | 1.056336  |
| P  | -2.638653 | 1.648425  | -0.681545 |
| N  | 3.446115  | 1.253768  | 1.118067  |
| N  | 3.399850  | 1.334965  | -3.210214 |
| N  | 2.694882  | 1.487256  | -2.015770 |
| N  | 5.330177  | 0.101878  | -2.467322 |
| N  | 5.043804  | 0.039070  | -1.109669 |
| N  | -0.104118 | -0.036506 | 0.328054  |
| C  | 3.519907  | 2.611048  | 1.072386  |
| H  | 3.303563  | 3.074938  | 0.119378  |
| C  | 3.872452  | 3.383473  | 2.183195  |
| H  | 3.929833  | 4.463154  | 2.082927  |
| C  | 4.167884  | 2.759027  | 3.418180  |
| C  | 4.095792  | 1.350450  | 3.449797  |
| H  | 4.332319  | 0.831697  | 4.372255  |
| C  | 3.749425  | 0.617775  | 2.300329  |
| C  | 4.575772  | 3.562365  | 4.630019  |
| H  | 3.958420  | 4.460933  | 4.742731  |
| H  | 5.616738  | 3.900869  | 4.534123  |
| H  | 4.504103  | 2.978551  | 5.552771  |
| C  | 4.225491  | 0.144963  | -3.416310 |
| H  | 4.643854  | 0.190914  | -4.425103 |



|   |           |           |           |
|---|-----------|-----------|-----------|
| C | 3.112160  | 2.361241  | -4.087895 |
| H | 3.561190  | 2.426786  | -5.068522 |
| C | 2.203921  | 3.198662  | -3.449087 |
| H | 1.771041  | 4.104572  | -3.842576 |
| C | 1.969517  | 2.617241  | -2.172104 |
| H | 1.312546  | 2.959830  | -1.387892 |
| C | 6.693724  | 0.114179  | -2.687168 |
| H | 7.122125  | 0.160557  | -3.678014 |
| C | 7.304064  | 0.057829  | -1.437976 |
| H | 8.363491  | 0.050225  | -1.235437 |
| C | 6.244053  | 0.012700  | -0.490361 |
| H | 6.308556  | -0.035905 | 0.585524  |
| C | 1.048938  | -0.018144 | 0.006666  |
| C | -1.587315 | 0.427823  | 3.294151  |
| C | -2.820210 | 1.095498  | 2.927269  |
| C | -3.795002 | 0.072557  | 2.560516  |
| C | -0.357495 | 1.088989  | 3.851439  |
| H | -0.364114 | 1.022734  | 4.949250  |
| H | -0.313343 | 2.151644  | 3.593593  |
| H | 0.561912  | 0.607524  | 3.499741  |
| C | -3.115021 | 2.553381  | 3.154441  |
| H | -3.164827 | 2.745288  | 4.235894  |
| H | -4.083097 | 2.837936  | 2.737725  |
| H | -2.348450 | 3.218527  | 2.743961  |
| C | -5.263483 | 0.309031  | 2.329830  |
| H | -5.778091 | 0.423337  | 3.294935  |
| H | -5.450928 | 1.216775  | 1.748801  |
| C | -2.130467 | 0.791586  | -2.303045 |
| H | -2.429977 | 1.412815  | -3.154898 |
| H | -1.036972 | 0.762599  | -2.274498 |
| C | -1.613616 | 3.225686  | -0.607309 |
| C | -0.645443 | 3.413544  | 0.400954  |
| H | -0.448264 | 2.624468  | 1.120431  |
| C | 0.066488  | 4.626963  | 0.480369  |
| H | 0.786775  | 4.778126  | 1.280677  |
| C | -0.173013 | 5.653332  | -0.453607 |
| H | 0.361633  | 6.596512  | -0.380949 |
| C | -1.129460 | 5.462074  | -1.471295 |
| H | -1.329743 | 6.254630  | -2.186938 |
| C | -1.853449 | 4.257716  | -1.543449 |
| H | -2.618421 | 4.144512  | -2.307415 |
| C | -4.364839 | 2.330511  | -0.991021 |
| C | -4.885155 | 3.295842  | -0.098228 |
| H | -4.293361 | 3.645283  | 0.742251  |

|   |           |           |           |
|---|-----------|-----------|-----------|
| C | -6.153945 | 3.859476  | -0.316979 |
| H | -6.537222 | 4.608297  | 0.370578  |
| C | -6.919706 | 3.469450  | -1.433618 |
| H | -7.897739 | 3.909300  | -1.606082 |
| C | -6.400765 | 2.522161  | -2.335200 |
| H | -6.974345 | 2.232766  | -3.211410 |
| C | -5.130658 | 1.953996  | -2.116350 |
| H | -4.753926 | 1.246328  | -2.847987 |
| P | -2.766667 | -1.582504 | -0.762694 |
| N | 3.442683  | -1.380482 | 0.993625  |
| N | 3.399382  | -1.058052 | -3.319312 |
| N | 2.692969  | -1.315944 | -2.144262 |
| C | 3.506780  | -2.727949 | 0.822132  |
| H | 3.287906  | -3.099819 | -0.169955 |
| C | 3.850440  | -3.603106 | 1.857257  |
| H | 3.898952  | -4.669194 | 1.657522  |
| C | 4.146628  | -3.098345 | 3.145377  |
| C | 4.082876  | -1.698168 | 3.308117  |
| H | 4.318410  | -1.269600 | 4.276102  |
| C | 3.745616  | -0.859365 | 2.231126  |
| C | 4.548682  | -4.011606 | 4.278713  |
| H | 3.980793  | -4.948449 | 4.262834  |
| H | 5.611122  | -4.280336 | 4.195983  |
| H | 4.406464  | -3.539454 | 5.255854  |
| C | 3.106485  | -1.997945 | -4.287349 |
| H | 3.555424  | -1.975815 | -5.269944 |
| C | 2.194159  | -2.885772 | -3.727437 |
| H | 1.757350  | -3.749549 | -4.202317 |
| C | 1.961702  | -2.422645 | -2.402570 |
| H | 1.303728  | -2.831531 | -1.651710 |
| C | -1.800057 | -1.001338 | 3.193709  |
| C | -3.166342 | -1.222508 | 2.761677  |
| C | -0.822874 | -2.052555 | 3.641075  |
| H | -0.822394 | -2.115047 | 4.739167  |
| H | -1.084438 | -3.046672 | 3.267097  |
| H | 0.201892  | -1.819251 | 3.329024  |
| C | -3.867786 | -2.550131 | 2.732305  |
| H | -4.274245 | -2.759369 | 3.732964  |
| H | -4.706442 | -2.561661 | 2.033718  |
| H | -3.198047 | -3.377130 | 2.475880  |
| H | -5.734940 | -0.526692 | 1.806635  |
| C | -2.709320 | -0.631619 | -2.431759 |
| H | -3.731725 | -0.620413 | -2.818728 |
| H | -2.101212 | -1.218850 | -3.127115 |

|   |           |           |           |
|---|-----------|-----------|-----------|
| C | -1.657785 | -3.079135 | -1.004527 |
| C | -0.810927 | -3.507791 | 0.037443  |
| H | -0.736990 | -2.922939 | 0.948073  |
| C | -0.064562 | -4.695522 | -0.095953 |
| H | 0.561460  | -5.035208 | 0.725346  |
| C | -0.151610 | -5.457834 | -1.277144 |
| H | 0.404836  | -6.386340 | -1.371907 |
| C | -0.984451 | -5.023641 | -2.328690 |
| H | -1.072620 | -5.616389 | -3.235063 |
| C | -1.738552 | -3.843173 | -2.191873 |
| H | -2.408801 | -3.552008 | -2.997170 |
| C | -4.496289 | -2.323165 | -0.740203 |
| C | -4.705297 | -3.712849 | -0.603968 |
| H | -3.868393 | -4.396937 | -0.506548 |
| C | -6.013786 | -4.233390 | -0.604096 |
| H | -6.164606 | -5.304798 | -0.506448 |
| C | -7.120934 | -3.374536 | -0.736374 |
| H | -8.128652 | -3.779898 | -0.743577 |
| C | -6.915126 | -1.985840 | -0.859249 |
| H | -7.765005 | -1.316097 | -0.958272 |
| C | -5.610661 | -1.460785 | -0.854342 |
| H | -5.478516 | -0.385518 | -0.934643 |
